# Supplementary material for: Technical Note: Past and future warming – Direct comparison on multi-century timescales
Source: Copernicus journal article supplement (doi:10.5194/cp-2021-146), 2021-11-01
Supplement: Supplementary file 1 [file cp-2021-146-supplement-version1.zip]

## Sheet: readMe
Instrumental temperature (1850-2020)
AR6-WGI assessed four-dataset mean (HadCRUT, NOAA, Berkeley, Kadow) from Chapter 2 (Gulev et al., 2021: https://www.ipcc.ch/report/ar6/wg1/downloads/report/IPCC_AR6_WGI_Chapter_02.pdf)
Holocene temperature (12,000 yr BP to present) - Kaufman
Marine and terrestrial proxy based global temperature reconstruction from: Kaufman et al. (2020: 10.1038/s41597-020-0530-7)
Multi-method median reconstruction, 5-95 percentile ensemble range
Relative to 1800-1900 = 150-50 yr before 1950 = 100-200 yr before 2000
Ages are mid points of 100-year-long bins
Holocene temperature (12,000 yr BP to present) - Osman
Marine data-assimilation based global temperature reconstruction from: Osman et al. (2021: 10.1038/s41586-021-03984-4)
5-95 percentile ensemble range
Subtracted 13.49°C (median of the most recent bin) to adjust absolute GMST to ∆ GMST relative to 1750-1950 = 200-0 yr before 1950 = 250-50 yr before 2000
Lake Quaternary - Hansen
Benthic marine oxygen isotope (stacked) converted to GMST based on formulas from Hansen et al. (2013: 10.1098/rsta.2012.0294)
Subtracted 14.15°C to adjust absolute GMST to ∆ GMST and added 0.36°C to adjust 1961-1900 to 1850-1900
Lake Quaternary - Snyder
Plactic marine oxygen isotope (stacked) scaled to ∆ GMST from Snyder (2016: 10.1038/nature19798)
Added 0.2°C to adjust ∆ GMST estimated for late Holocene to 1850-1900 based on Kaufman et al. (2020: 10.1038/s41597-020-0530-7)
Projections
From WGI- Table 4.5, based on multiple lines of evidence 5-95% ranges (Lee et al. 2021: https://www.ipcc.ch/report/ar6/wg1/downloads/report/IPCC_AR6_WGI_Chapter_04.pdf); based on MAGICC v7.5 output (Meinshausen et al. 2020: 10.5194/gmd-13-3571-2020)
Subtract 0.85°C to adjust ∆GMST to 1850-1900

## Sheet: reconstructions
Instrumental					Kaufman - Temp12k					Osman - SST data assimilation					Hansen -benthic stack				Snyder - planktic stack
Year CE	AR6 mean (°C)	0.05	0.95		Age (BP)	Median (°C)	0.05	0.95		Age (BP)	Median (°C) adjusted (-13.49°)	0.05	0.95		Age (BP)	GMST (°C)	Adjusted (-14.15+0.36°)		Age (BP)	∆GMST (°C)	Adjusted (+0.2°)
2020	1.25632	1.19881	1.30567		0	0.0876933	-0.2624	0.579471		100	0	-0.359258	0.337563		0	14	0.21		1000	-0.174916	0.0250836
2019	1.22632	1.16031	1.28417		100	0	-0.342005	0.355638		300	-0.105713	-0.434053	0.198047		1600	14.24	0.45		2000	-0.0932424	0.106758
2018	1.10132	1.04881	1.14567		200	0.05046	-0.289516	0.386743		500	-0.104416	-0.419496	0.137967		2400	14.37	0.58		3000	0.0274275	0.227427
2017	1.17882	1.12581	1.22717		300	0.0249831	-0.313276	0.359186		700	-0.0561981	-0.372414	0.173972		3200	14.37	0.58		4000	0.0820681	0.282068
2016	1.26382	1.20731	1.31567		400	0.0349149	-0.316197	0.347519		900	0.0348511	-0.273329	0.318877		4000	14.02	0.23		5000	0.12975	0.32975
2015	1.14882	1.09731	1.18578		500	0.0369013	-0.284304	0.339327		1100	-0.00265503	-0.291684	0.260999		4800	13.83	0.04		6000	0.136328	0.336328
2014	1.00632	0.951814	1.03867		600	0.0728204	-0.240118	0.365221		1300	-0.0344696	-0.35558	0.244283		5400	14.04	0.25		7000	0.058979	0.258979
2013	0.936324	0.864814	0.975784		700	0.0740505	-0.227741	0.381816		1500	-0.0285797	-0.368977	0.190201		6200	14	0.21		8000	-0.0617949	0.138205
2012	0.906324	0.841814	0.948667		800	0.0838186	-0.201557	0.374821		1700	-0.0799255	-0.413007	0.171207		7000	13.93	0.14		9000	-0.339057	-0.139057
2011	0.881324	0.814667	0.925814		900	0.0843281	-0.217441	0.379331		1900	-0.101074	-0.494987	0.158861		7800	14.2	0.41		10000	-0.74452	-0.54452
2010	0.996324	0.916314	1.04017		1000	0.11429	-0.18778	0.420281		2100	-0.121277	-0.487732	0.175568		8600	14.28	0.49		11000	-1.33158	-1.13158
2009	0.926324	0.847814	0.968667		1100	0.140306	-0.145319	0.470434		2300	-0.129822	-0.508907	0.15117		9600	13.46	-0.33		12000	-2.00481	-1.80481
2008	0.796324	0.733314	0.830167		1200	0.170855	-0.118811	0.511145		2500	-0.10672	-0.458261	0.1987		10400	13.21	-0.58		13000	-2.71415	-2.51415
2007	0.921324	0.847667	0.958814		1300	0.179427	-0.0720079	0.503953		2700	-0.167191	-0.507384	0.156342		11200	12.84	-0.95		14000	-3.44359	-3.24359
2006	0.903824	0.841814	0.947167		1400	0.137669	-0.115245	0.450058		2900	-0.181778	-0.56035	0.0803146		11800	12.68	-1.11		15000	-4.11713	-3.91713
2005	0.943824	0.881814	0.987167		1500	0.130293	-0.131311	0.399249		3100	-0.201965	-0.578517	0.104507		12800	11.97	-1.82		16000	-4.70437	-4.50437
2004	0.803824	0.736167	0.836618		1600	0.129764	-0.143958	0.408128		3300	-0.268585	-0.66096	0.0507278		13600	11.76	-2.03		17000	-5.27327	-5.07327
2003	0.878824	0.814667	0.917314		1700	0.142634	-0.111795	0.464822		3500	-0.23259	-0.658629	0.0530258		14800	10.92	-2.87		18000	-5.67317	-5.47317
2002	0.881324	0.806167	0.927314		1800	0.15159	-0.104687	0.460011		3700	-0.288132	-0.633585	0.0285629		16000	10.64	-3.15		19000	-5.93189	-5.73189
2001	0.811324	0.737814	0.845784		1900	0.135055	-0.124824	0.412622		3900	-0.274567	-0.667079	0.0306717		17000	9.72	-4.07		20000	-6.14021	-5.94021
2000	0.668824	0.611814	0.707167		2000	0.157204	-0.0987259	0.422521		4100	-0.274948	-0.608949	0.0485031		17600	9.49	-4.3		21000	-6.25758	-6.05758
1999	0.666324	0.603167	0.707314		2100	0.17333	-0.0679537	0.489499		4300	-0.269363	-0.623772	0.0854355		18400	9.35	-4.44		22000	-6.27741	-6.07741
1998	0.901324	0.817814	0.948667		2200	0.199327	-0.0257922	0.53342		4500	-0.216965	-0.585535	0.110031		18800	9.56	-4.23		23000	-6.24992	-6.04992
1997	0.758824	0.686167	0.798814		2300	0.214391	-0.00915961	0.570073		4700	-0.197754	-0.541411	0.170595		19500	9.46	-4.33		24000	-6.2296	-6.0296
1996	0.613824	0.537667	0.657314		2400	0.217893	-0.0126512	0.563917		4900	-0.187042	-0.578891	0.150456		20500	9.83	-3.96		25000	-6.12387	-5.92387
1995	0.726324	0.663167	0.767314		2500	0.223889	-0.00698164	0.61134		5100	-0.149445	-0.578096	0.174756		21700	9.69	-4.1		26000	-5.96597	-5.76597
1994	0.576324	0.513167	0.610314		2600	0.220448	-0.0148523	0.584819		5300	-0.220734	-0.619345	0.149484		22500	9.9	-3.89		27000	-5.9355	-5.7355
1993	0.521324	0.453167	0.560314		2700	0.228447	-0.00143585	0.613269		5500	-0.254333	-0.632111	0.0774612		23700	9.83	-3.96		28000	-5.88897	-5.68897
1992	0.473824	0.411667	0.510314		2800	0.246142	0.00930338	0.653556		5700	-0.237274	-0.620468	0.0832535		24800	9.96	-3.83		29000	-5.91897	-5.71897
1991	0.676324	0.606167	0.710314		2900	0.269003	0.0354056	0.687877		5900	-0.229004	-0.597084	0.148242		25800	9.94	-3.85		30000	-5.83199	-5.63199
1990	0.698824	0.634667	0.730314		3000	0.286939	0.0511267	0.714054		6100	-0.203506	-0.62328	0.146143		26600	10.14	-3.65		31000	-5.74032	-5.54032
1989	0.523824	0.488667	0.540314		3100	0.299127	0.0792016	0.77481		6300	-0.206955	-0.587447	0.206625		27800	10.33	-3.46		32000	-5.63389	-5.43389
1988	0.633824	0.597167	0.656618		3200	0.301982	0.0932402	0.774285		6500	-0.204086	-0.596408	0.15154		28700	10.43	-3.36		33000	-5.58019	-5.38019
1987	0.578824	0.523167	0.608814		3300	0.308176	0.0878804	0.787575		6700	-0.240143	-0.627419	0.0923569		29700	10.57	-3.22		34000	-5.56328	-5.36328
1986	0.441324	0.391667	0.468814		3400	0.332894	0.129794	0.814932		6900	-0.323532	-0.74124	0.060199		30700	10.52	-3.27		35000	-5.58137	-5.38137
1985	0.401324	0.350167	0.435118		3500	0.331519	0.114816	0.885922		7100	-0.316559	-0.799141	0.0152435		31700	10.71	-3.08		36000	-5.59108	-5.39108
1984	0.408824	0.375667	0.435118		3600	0.356604	0.132964	0.922226		7300	-0.438065	-0.840865	-0.0435883		32400	10.41	-3.38		37000	-5.62122	-5.42122
1983	0.571324	0.528667	0.596618		3700	0.366205	0.140901	0.974442		7500	-0.439209	-0.855629	-0.0511917		33500	10.51	-3.28		38000	-5.7164	-5.5164
1982	0.396324	0.364167	0.425118		3800	0.374078	0.145172	0.926169		7700	-0.475983	-0.851274	-0.0776352		34300	10.43	-3.36		39000	-5.75091	-5.55091
1981	0.586324	0.531814	0.618667		3900	0.362074	0.132956	0.906923		7900	-0.43541	-0.819878	-0.0733932		35100	10.64	-3.15		40000	-5.81135	-5.61135
1980	0.541324	0.474667	0.578814		4000	0.362222	0.130973	0.879945		8100	-0.435486	-0.822609	-0.042601		36300	10.45	-3.34		41000	-5.80441	-5.60441
1979	0.436324	0.398667	0.456618		4100	0.360897	0.136763	0.926239		8300	-0.471756	-0.86933	-0.0979263		37600	10.72	-3.07		42000	-5.72722	-5.52722
1978	0.348824	0.293167	0.376618		4200	0.361735	0.133829	0.910921		8500	-0.470413	-0.895076	-0.0634308		38400	10.67	-3.12		43000	-5.6272	-5.4272
1977	0.453824	0.391667	0.497314		4300	0.350587	0.131621	0.915768		8700	-0.60437	-1.05	-0.153764		39400	10.84	-2.95		44000	-5.43086	-5.23086
1976	0.148824	0.137196	0.167314		4400	0.359552	0.148457	0.961109		8900	-0.63028	-1.05141	-0.22834		40400	10.82	-2.97		45000	-5.35092	-5.15092
1975	0.241324	0.190167	0.270314		4500	0.370431	0.15294	0.970915		9100	-0.622391	-1.05628	-0.220908		41100	10.86	-2.93		46000	-5.27944	-5.07944
1974	0.183824	0.130167	0.223618		4600	0.381573	0.161354	0.97259		9300	-0.790817	-1.20513	-0.413777		41900	10.72	-3.07		47000	-5.30029	-5.10029
1973	0.403824	0.374784	0.433		4700	0.394818	0.183073	1.00828		9500	-0.926056	-1.38578	-0.490587		43000	10.79	-3		48000	-5.30382	-5.10382
1972	0.261324	0.210167	0.302118		4800	0.406483	0.178218	1.04499		9700	-0.948273	-1.39673	-0.52771		44200	10.86	-2.93		49000	-5.20691	-5.00691
1971	0.153824	0.124167	0.183618		4900	0.423083	0.197803	1.09044		9900	-1.05527	-1.4304	-0.658595		45400	10.9	-2.89		50000	-5.11283	-4.91283
1970	0.273824	0.235667	0.319118		5000	0.432132	0.202848	1.0966		10100	-1.20122	-1.61243	-0.796526		46500	10.93	-2.86		51000	-4.94614	-4.74614
1969	0.313824	0.270167	0.336618		5100	0.431694	0.210116	1.08044		10300	-1.23553	-1.67812	-0.831595		47500	10.93	-2.86		52000	-4.82839	-4.62839
1968	0.171324	0.120784	0.2045		5200	0.438701	0.203959	1.09783		10500	-1.23482	-1.65859	-0.724086		48300	10.94	-2.85		53000	-4.80149	-4.60149
1967	0.238824	0.197167	0.273618		5300	0.45249	0.201805	1.14406		10700	-1.2984	-1.72162	-0.899223		49100	10.84	-2.95		54000	-4.79965	-4.59965
1966	0.206324	0.158667	0.243618		5400	0.446507	0.219007	1.13802		10900	-1.39595	-1.86083	-1.0171		49900	10.67	-3.12		55000	-4.87685	-4.67685
1965	0.153824	0.117167	0.183618		5500	0.451368	0.214042	1.14548		11100	-1.57166	-1.99528	-1.1383		50700	10.99	-2.8		56000	-4.92292	-4.72292
1964	0.0463235	0.0232843	0.073		5600	0.466164	0.23925	1.21476		11300	-1.83315	-2.32159	-1.36373		51300	11.06	-2.73		57000	-5.07899	-4.87899
1963	0.296324	0.257784	0.3175		5700	0.478236	0.226121	1.26602		11500	-2.13664	-2.60991	-1.68476		51900	11.2	-2.59		58000	-5.21384	-5.01384
1962	0.261324	0.226284	0.292314		5800	0.49169	0.247077	1.28271		11700	-2.49103	-2.99694	-1.99161		52800	11.45	-2.34		59000	-5.46001	-5.26001
1961	0.308824	0.243784	0.346		5900	0.492636	0.246771	1.26254		11900	-2.8665	-3.34002	-2.42879		53400	11.56	-2.23		60000	-5.64624	-5.44624
1960	0.231324	0.197167	0.255118		6000	0.513524	0.272515	1.29268		12100	-3.00989	-3.48396	-2.58904		54200	11.24	-2.55		61000	-5.79945	-5.59945
1959	0.286324	0.248814	0.305784		6100	0.527183	0.277557	1.36663		12300	-3.26837	-3.68404	-2.79018		55200	11.19	-2.6		62000	-5.89394	-5.69394
1958	0.306324	0.260314	0.334284		6200	0.533366	0.29139	1.37537		12500	-3.45468	-3.87871	-3.00247		56000	11.39	-2.4		63000	-6.01382	-5.81382
1957	0.296324	0.242284	0.326		6300	0.53212	0.278647	1.39664		12700	-3.55466	-3.95573	-3.15822		57000	11.09	-2.7		64000	-6.06193	-5.86193
1956	0.0763235	0.0122843	0.123		6400	0.537373	0.291813	1.36237		12900	-3.4938	-3.91891	-3.0723		58100	10.84	-2.95		65000	-6.11889	-5.91889
1955	0.138824	0.0576667	0.185118		6500	0.533194	0.287955	1.3822		13100	-3.36841	-3.78318	-2.95279		59100	11	-2.79		66000	-5.98923	-5.78923
1954	0.196324	0.117814	0.235784		6600	0.542816	0.300975	1.39632		13300	-3.36079	-3.79916	-2.96174		60500	11.12	-2.67		67000	-5.82235	-5.62235
1953	0.388824	0.314814	0.434284		6700	0.534623	0.294444	1.34012		13500	-3.50557	-3.89147	-3.09289		61900	10.92	-2.87		68000	-5.59489	-5.39489
1952	0.323824	0.239314	0.372784		6800	0.5263	0.285566	1.32724		13700	-3.63579	-4.064	-3.24298		62700	10.92	-2.87		69000	-5.33619	-5.13619
1951	0.251324	0.176784	0.293814		6900	0.519547	0.267008	1.31158		13900	-3.74594	-4.18356	-3.35028		63500	11.09	-2.7		70000	-5.03196	-4.83196
1950	0.0963235	0.0492843	0.125314		7000	0.512071	0.266212	1.29848		14100	-3.93636	-4.38288	-3.48654		64300	10.76	-3.03		71000	-4.61392	-4.41392
1949	0.173824	0.119284	0.213814		7100	0.510502	0.252452	1.30396		14300	-4.12979	-4.64487	-3.69519		65100	10.74	-3.05		72000	-4.30832	-4.10832
1948	0.181324	0.110784	0.233814		7200	0.494029	0.230567	1.26167		14500	-4.35687	-4.86505	-3.84935		66100	10.77	-3.02		73000	-4.00551	-3.80551
1947	0.241324	0.176167	0.270314		7300	0.477563	0.226347	1.23789		14700	-4.59697	-5.1049	-4.11352		67400	11.11	-2.68		74000	-3.69548	-3.49548
1946	0.196324	0.140784	0.233814		7400	0.470621	0.188044	1.19242		14900	-4.82893	-5.3411	-4.29023		68900	11.35	-2.44		75000	-3.29754	-3.09754
1945	0.348824	0.311314	0.392784		7500	0.447134	0.167142	1.15538		15100	-5.08517	-5.67824	-4.56401		70300	11.67	-2.12		76000	-2.96669	-2.76669
1944	0.471324	0.413314	0.500167		7600	0.438546	0.166724	1.08865		15300	-5.38344	-5.9663	-4.79075		71500	11.91	-1.88		77000	-2.78789	-2.58789
1943	0.348824	0.284667	0.380314		7700	0.430768	0.139789	1.06091		15500	-5.58762	-6.21614	-5.05679		72900	11.9	-1.89		78000	-2.60503	-2.40503
1942	0.321324	0.270784	0.353814		7800	0.420816	0.155433	1.00753		15700	-5.79417	-6.49908	-5.18597		74000	11.79	-2		79000	-2.47422	-2.27422
1941	0.356324	0.318118	0.395696		7900	0.402887	0.120754	0.950897		15900	-6.10829	-6.81863	-5.38922		75000	11.83	-1.96		80000	-2.36024	-2.16024
1940	0.371324	0.325814	0.426784		8000	0.385961	0.124162	0.897319		16100	-6.29948	-7.06445	-5.69486		76600	12.09	-1.7		81000	-2.3118	-2.1118
1939	0.271324	0.195284	0.315314		8100	0.376719	0.116317	0.868199		16300	-6.4399	-7.21761	-5.82479		77800	12.31	-1.48		82000	-2.33629	-2.13629
1938	0.286324	0.198284	0.342314		8200	0.352625	0.0919708	0.832606		16500	-6.61679	-7.39809	-5.92212		78600	12.68	-1.11		83000	-2.34479	-2.14479
1937	0.283824	0.196784	0.335314		8300	0.33881	0.0952875	0.784243		16700	-6.94844	-7.71	-6.18908		79400	12.74	-1.05		84000	-2.38759	-2.18759
1936	0.136324	0.0637843	0.183814		8400	0.32616	0.0679036	0.751954		16900	-7.18448	-7.90628	-6.40712		80600	12.65	-1.14		85000	-2.55976	-2.35976
1935	0.0888235	0.0277843	0.142314		8500	0.323841	0.0621654	0.73498		17100	-7.27063	-8.14327	-6.5846		81200	12.7	-1.09		86000	-2.71603	-2.51603
1934	0.136324	0.0707843	0.183814		8600	0.312583	0.056402	0.732199		17300	-7.39029	-8.20523	-6.59558		82000	12.53	-1.26		87000	-2.85288	-2.65288
1933	-0.0111765	-0.0692157	0.0323137		8700	0.298876	0.0452024	0.704908		17500	-7.32217	-8.15311	-6.60365		83200	12.07	-1.72		88000	-2.88686	-2.68686
1932	0.153824	0.0682843	0.203814		8800	0.292385	0.0482018	0.677129		17700	-7.41213	-8.24019	-6.57725		84600	12.17	-1.62		89000	-2.82212	-2.62212
1931	0.198824	0.125284	0.250814		8900	0.290347	0.0288585	0.685983		17900	-7.42487	-8.16563	-6.55827		85600	12.29	-1.5		90000	-2.81908	-2.61908
1930	0.136324	0.0737843	0.173814		9000	0.283106	0.0419124	0.671549		18100	-7.29742	-8.08702	-6.60515		86800	12.16	-1.63		91000	-2.76867	-2.56867
1929	-0.0711765	-0.120716	-0.0361863		9100	0.282435	0.0253725	0.63851		18300	-7.24046	-7.94992	-6.5011		87900	12.06	-1.73		92000	-2.68027	-2.48027
1928	0.0913235	0.0163137	0.141284		9200	0.273485	0.0128646	0.632516		18500	-7.30998	-7.99132	-6.57225		88700	12.08	-1.71		93000	-2.59983	-2.39983
1927	0.0813235	0.00678431	0.123814		9300	0.265644	0.00579951	0.643737		18700	-7.20483	-7.95193	-6.52495		89500	12.23	-1.56		94000	-2.42282	-2.22282
1926	0.186324	0.107814	0.232784		9400	0.258031	-0.00471234	0.634255		18900	-7.14604	-7.9042	-6.50682		90300	12.2	-1.59		95000	-2.24108	-2.04108
1925	0.0563235	-0.0138333	0.0951176		9500	0.244089	-0.0343327	0.603602		19100	-7.06911	-7.82177	-6.42702		91100	12.14	-1.65		96000	-2.07183	-1.87183
1924	0.0188235	-0.0377157	0.0475		9600	0.234489	-0.0701835	0.577725		19300	-7.06918	-7.77609	-6.39823		92200	12.37	-1.42		97000	-1.88621	-1.68621
1923	0.0163235	-0.0538333	0.0503137		9700	0.209716	-0.113904	0.530674		19500	-7.1136	-7.87215	-6.46665		93200	12.85	-0.94		98000	-1.71578	-1.51578
1922	-0.00867647	-0.0581863	0.0157843		9800	0.179746	-0.199961	0.514065		19700	-7.13869	-7.90424	-6.52288		94200	12.65	-1.14		99000	-1.60899	-1.40899
1921	0.0738235	0.0118137	0.114284		9900	0.15484	-0.276148	0.470484		19900	-7.18126	-7.82265	-6.47338		95100	12.71	-1.08		100000	-1.55112	-1.35112
1920	0.0338235	-0.0602157	0.1		10000	0.123683	-0.401203	0.438197		20100	-7.10693	-7.76561	-6.34383		96100	12.88	-0.91		101000	-1.49651	-1.29651
1919	-0.00617647	-0.0607157	0.0275		10100	0.0931797	-0.454907	0.41126		20300	-7.08191	-7.83288	-6.31391		96900	12.85	-0.94		102000	-1.56491	-1.36491
1918	-0.0611765	-0.102833	-0.0263824		10200	0.0684639	-0.521842	0.375443		20500	-7.11078	-7.78576	-6.33438		97900	12.57	-1.22		103000	-1.59589	-1.39589
1917	-0.213676	-0.255216	-0.1825		10300	0.045913	-0.565656	0.369385		20700	-7.08875	-7.82535	-6.33745		98800	12.77	-1.02		104000	-1.74845	-1.54845
1916	-0.0861765	-0.130716	-0.0625		10400	0.0121612	-0.726258	0.332278		20900	-7.09601	-7.81403	-6.41313		99700	12.74	-1.05		105000	-1.82455	-1.62455
1915	0.136324	0.0822843	0.165314		10500	-0.0170824	-0.829911	0.302472		21100	-7.09354	-7.73631	-6.3917		100900	12.85	-0.94		106000	-1.93586	-1.73586
1914	0.0788235	0.0392843	0.0975		10600	-0.0721382	-1.01449	0.240899		21300	-6.97746	-7.7614	-6.19885		101900	13.01	-0.78		107000	-2.05979	-1.85979
1913	-0.113676	-0.144333	-0.0911863		10700	-0.120885	-1.19142	0.206941		21500	-6.94511	-7.59901	-6.11868		102700	13.06	-0.73		108000	-2.15431	-1.95431
1912	-0.136176	-0.157186	-0.119833		10800	-0.171341	-1.33945	0.158271		21700	-6.88391	-7.58491	-6.13898		103800	12.85	-0.94		109000	-2.21836	-2.01836
1911	-0.208676	-0.235686	-0.185716		10900	-0.227079	-1.49307	0.0994388		21900	-6.85194	-7.61694	-6.13483		105200	12.91	-0.88		110000	-2.22991	-2.02991
1910	-0.191176	-0.223716	-0.1725		11000	-0.269304	-1.74651	0.0353426		22100	-6.80321	-7.54377	-6.07984		106200	12.72	-1.07		111000	-1.92866	-1.72866
1909	-0.221176	-0.255216	-0.187686		11100	-0.344789	-1.9755	-0.0208509		22300	-6.67842	-7.46227	-5.92215		107200	12.53	-1.26		112000	-1.52283	-1.32283
1908	-0.173676	-0.219216	-0.1525		11200	-0.407156	-2.18197	-0.0971015		22500	-6.61084	-7.33062	-5.87664		108800	12.41	-1.38		113000	-1.11891	-0.918909
1907	-0.133676	-0.157333	-0.113382		11300	-0.474778	-2.40137	-0.150859		22700	-6.46898	-7.19871	-5.7843		110000	12.58	-1.21		114000	-0.768125	-0.568125
1906	0.0238235	-0.0207157	0.0545		11400	-0.539282	-2.72764	-0.207646		22900	-6.46782	-7.07524	-5.75742		111000	12.51	-1.28		115000	-0.479427	-0.279427
1905	-0.0536765	-0.0673333	-0.0433824		11500	-0.604445	-3.04531	-0.273579		23100	-6.39626	-7.14782	-5.66103		112000	12.85	-0.94		116000	-0.122452	0.0775476
1904	-0.238676	-0.257333	-0.223382		11600	-0.693769	-3.40562	-0.356562		23300	-6.32573	-7.06499	-5.50049		113000	13.06	-0.73		117000	0.278968	0.478968
1903	-0.168676	-0.181	-0.152716		11700	-0.795244	-3.71828	-0.429677		23500	-6.33896	-6.95013	-5.67383		113700	13.24	-0.55		118000	0.673345	0.873345
1902	-0.0786765	-0.091	-0.0693039		11800	-0.883492	-4.05555	-0.502344		23700	-6.21506	-6.95627	-5.54831		114500	13.39	-0.4		119000	1.09971	1.29971
1901	0.0638235	0.0441667	0.0788137		11900	-0.97215	-4.555	-0.507236		23900	-6.12305	-6.81814	-5.47023		115500	13.16	-0.63		120000	1.54239	1.74239
1900	0.116324	0.0828137	0.155667		12000	-1.05682	-4.90621	-0.571804							116500	12.97	-0.82		121000	1.84996	2.04996
1899	0.0163235	-0.00280392	0.0458137												117500	13.39	-0.4		122000	1.98296	2.18296
1898	-0.113676	-0.141	-0.0687157												118400	13.67	-0.12		123000	1.99167	2.19167
1897	0.0888235	0.0710294	0.100167												119200	13.77	-0.02		124000	1.78139	1.98139
1896	0.0888235	0.0772843	0.106814												119900	14.52	0.73		125000	1.49479	1.69479
1895	-0.0586765	-0.101	-0.0123039												120500	15.51	1.72		126000	1.18419	1.38419
1894	-0.101176	-0.1395	-0.0627157												121500	14.89	1.1		127000	0.747626	0.947626
1893	-0.118676	-0.147333	-0.0841863												122400	15.07	1.28		128000	0.266593	0.466593
1892	-0.121176	-0.151686	-0.0912157												123600	15.56	1.77		129000	-0.295272	-0.0952718
1891	-0.0386765	-0.051	-0.0227157												124500	14.27	0.48		130000	-0.939993	-0.739993
1890	-0.146176	-0.153186	-0.132716												125500	13.59	-0.2		131000	-1.73675	-1.53675
1889	0.111324	0.0841667	0.137314												126300	13.31	-0.48		132000	-2.32707	-2.12707
1888	-0.0111765	-0.031	0.00919608												127600	12.93	-0.86		133000	-2.91184	-2.71184
1887	-0.168676	-0.200382	-0.140333												128600	11.84	-1.95		134000	-3.53494	-3.33494
1886	-0.113676	-0.158186	-0.0658039												129800	11.83	-1.96		135000	-4.10453	-3.90453
1885	-0.133676	-0.151971	-0.114216												131000	11.44	-2.35		136000	-4.55049	-4.35049
1884	-0.128676	-0.146833	-0.113471												132400	10.73	-3.06		137000	-4.82809	-4.62809
1883	-0.00117647	-0.0328333	0.0166176												133400	9.98	-3.81		138000	-5.00326	-4.80326
1882	0.0638235	0.0572843	0.0698137												134400	9.91	-3.88		139000	-5.12543	-4.92543
1881	0.116324	0.0692843	0.153												135400	9.86	-3.93		140000	-5.1864	-4.9864
1880	0.0313235	0.0102843	0.063												136800	9.63	-4.16		141000	-5.24932	-5.04932
1879	0.0838235	0.0601961	0.112118												137800	9.87	-3.92		142000	-5.2364	-5.0364
1878	0.331324	0.261814	0.392667												138600	9.97	-3.82		143000	-5.33627	-5.13627
1877	0.271324	0.234167	0.321314												139600	9.95	-3.84		144000	-5.48265	-5.28265
1876	-0.0436765	-0.0612157	-0.0301863												140400	9.93	-3.86		145000	-5.57503	-5.37503
1875	-0.00617647	-0.0283333	0.0375294												141000	10.13	-3.66		146000	-5.71183	-5.51183
1874	-0.0211765	-0.0286863	-0.0142157												141800	10.14	-3.65		147000	-5.79444	-5.59444
1873	0.0163235	-0.00583333	0.0373137												142600	10.17	-3.62		148000	-5.81611	-5.61611
1872	0.0238235	0.0117843	0.036												143300	10.1	-3.69		149000	-5.53601	-5.33601
1871	-0.00617647	-0.0183333	0.00831373												144100	10.25	-3.54		150000	-5.45451	-5.25451
1870	0.0213235	0.0180294	0.0257843												144900	10	-3.79		151000	-5.28496	-5.08496
1869	0.0588235	0.0401961	0.0703137												145700	9.93	-3.86		152000	-5.23833	-5.03833
1868	0.0613235	0.0116961	0.100314												146500	9.98	-3.81		153000	-5.33982	-5.13982
1867	0.0488235	-0.00280392	0.114314												147200	10.04	-3.75		154000	-5.21072	-5.01072
1866	0.0513235	0.0183137	0.0876961												148000	9.59	-4.2		155000	-5.12962	-4.92962
1865	0.0338235	0.0268137	0.0472843												148600	9.72	-4.07		156000	-5.11794	-4.91794
1864	-0.0486765	-0.103716	-0.0116863												149200	9.94	-3.85		157000	-5.27421	-5.07421
1863	0.00132353	-0.0406863	0.0281667												150000	9.98	-3.81		158000	-5.20103	-5.00103
1862	-0.153676	-0.222333	-0.0879706												150800	10.13	-3.66		159000	-5.12123	-4.92123
1861	-0.0911765	-0.137833	-0.0701863												151600	10.3	-3.49		160000	-5.09052	-4.89052
1860	-0.0561765	-0.0681863	-0.0373039												152600	10.39	-3.4
1859	0.0688235	0.0511176	0.0796667												153600	10.53	-3.26
1858	-0.0386765	-0.0482157	-0.0325												154400	10.5	-3.29
1857	-0.146176	-0.200686	-0.110333												155400	10.55	-3.24
1856	-0.0511765	-0.0897157	0.0218137												156300	10.65	-3.14
1855	0.0488235	0.0402843	0.0575												157300	10.64	-3.15
1854	0.0488235	0.0251961	0.0653137												158100	10.45	-3.34
1853	0.0463235	0.0281176	0.0796961												159100	10.37	-3.42
1852	0.0788235	0.0436961	0.120814												159900	10.47	-3.32
1851	0.0488235	0.00181373	0.116696												161000	10.61	-3.18
1850	-0.0586765	-0.0803824	-0.0263333

## Sheet: projections
SSP1-2.6 (adjust by -0.85°C)					SSP2-4.5 (adjust by -0.85°C)					SSP3-7.0 (adjust by -0.85°C)
year	mean (°C)	0.05	0.95		year	mean (°C)	0.05	0.95		year	mean (°C)	0.05	0.95
1850	-0.0380162	-0.160342	0.100271		1850	-0.0380162	-0.160342	0.100271		1850	-0.0380162	-0.160436	0.100178
1851	-0.00833719	-0.127401	0.125091		1851	-0.00833719	-0.127401	0.125091		1851	-0.00833719	-0.127495	0.124998
1852	-0.00558169	-0.125635	0.128725		1852	-0.00558169	-0.125635	0.128725		1852	-0.00558169	-0.125728	0.128631
1853	-0.00837499	-0.127117	0.124632		1853	-0.00837499	-0.127117	0.124632		1853	-0.00837499	-0.12721	0.124539
1854	-0.0253584	-0.143599	0.109918		1854	-0.0253584	-0.143599	0.109918		1854	-0.0253584	-0.143692	0.109825
1855	-0.0302802	-0.150429	0.107415		1855	-0.0302802	-0.150429	0.107415		1855	-0.0302802	-0.150522	0.107321
1856	-0.022376	-0.142143	0.114702		1856	-0.022376	-0.142143	0.114702		1856	-0.022376	-0.142236	0.114609
1857	-0.023831	-0.142765	0.112439		1857	-0.023831	-0.142765	0.112439		1857	-0.023831	-0.142858	0.112345
1858	-0.0325567	-0.153511	0.104403		1858	-0.0325567	-0.153511	0.104403		1858	-0.0325567	-0.153605	0.104309
1859	-0.0219432	-0.14253	0.114631		1859	-0.0219432	-0.14253	0.114631		1859	-0.0219432	-0.142624	0.114538
1860	-0.01079	-0.130551	0.124325		1860	-0.01079	-0.130551	0.124325		1860	-0.01079	-0.130644	0.124231
1861	-0.00369937	-0.123684	0.131157		1861	-0.00369937	-0.123684	0.131157		1861	-0.00369937	-0.123777	0.131064
1862	-0.0228869	-0.140005	0.109871		1862	-0.0228869	-0.140005	0.109871		1862	-0.0228869	-0.140098	0.109778
1863	-0.0726815	-0.195327	0.0639059		1863	-0.0726815	-0.195327	0.0639059		1863	-0.0726815	-0.19542	0.0638126
1864	-0.0621311	-0.186934	0.0765849		1864	-0.0621311	-0.186934	0.0765849		1864	-0.0621311	-0.187027	0.0764916
1865	-0.0369146	-0.160315	0.0999831		1865	-0.0369146	-0.160315	0.0999831		1865	-0.0369146	-0.160408	0.0998898
1866	-0.0180711	-0.139785	0.116031		1866	-0.0180711	-0.139785	0.116031		1866	-0.0180711	-0.139878	0.115937
1867	-0.00538692	-0.12535	0.127282		1867	-0.00538692	-0.12535	0.127282		1867	-0.00538692	-0.125444	0.127188
1868	0.00150037	-0.118507	0.133682		1868	0.00150037	-0.118507	0.133682		1868	0.00150037	-0.1186	0.133589
1869	0.0126765	-0.10616	0.144628		1869	0.0126765	-0.10616	0.144628		1869	0.0126765	-0.106254	0.144535
1870	0.0189406	-0.0990998	0.150443		1870	0.0189406	-0.0990998	0.150443		1870	0.0189406	-0.0991931	0.15035
1871	0.0251698	-0.0919523	0.156484		1871	0.0251698	-0.0919523	0.156484		1871	0.0251698	-0.0920457	0.156391
1872	0.0306774	-0.085495	0.160269		1872	0.0306774	-0.085495	0.160269		1872	0.0306774	-0.0855883	0.160176
1873	0.0259991	-0.0895515	0.154917		1873	0.0259991	-0.0895515	0.154917		1873	0.0259991	-0.0896448	0.154824
1874	0.0105347	-0.104853	0.139791		1874	0.0105347	-0.104853	0.139791		1874	0.0105347	-0.104946	0.139697
1875	0.0141037	-0.102096	0.144785		1875	0.0141037	-0.102096	0.144785		1875	0.0141037	-0.102189	0.144692
1876	0.0152611	-0.100641	0.14615		1876	0.0152611	-0.100641	0.14615		1876	0.0152611	-0.100734	0.146057
1877	0.0181294	-0.0981976	0.149926		1877	0.0181294	-0.0981976	0.149926		1877	0.0181294	-0.0982909	0.149833
1878	0.0227772	-0.0945493	0.155569		1878	0.0227772	-0.0945493	0.155569		1878	0.0227772	-0.0946427	0.155476
1879	0.0264776	-0.0918452	0.159753		1879	0.0264776	-0.0918452	0.159753		1879	0.0264776	-0.0919386	0.15966
1880	0.0296922	-0.0880248	0.161578		1880	0.0296922	-0.0880248	0.161578		1880	0.0296922	-0.0881181	0.161485
1881	0.0309933	-0.0865549	0.162118		1881	0.0309933	-0.0865549	0.162118		1881	0.0309933	-0.0866482	0.162024
1882	0.0377648	-0.0796	0.167951		1882	0.0377648	-0.0796	0.167951		1882	0.0377648	-0.0796933	0.167857
1883	0.0308061	-0.083001	0.157978		1883	0.0308061	-0.083001	0.157978		1883	0.0308061	-0.0830943	0.157884
1884	-0.0528776	-0.170049	0.0813246		1884	-0.0528776	-0.170049	0.0813246		1884	-0.0528776	-0.170143	0.0812313
1885	-0.161915	-0.310333	0.000857267		1885	-0.161915	-0.310333	0.000857267		1885	-0.161915	-0.310427	0.000763938
1886	-0.120009	-0.258957	0.0351222		1886	-0.120009	-0.258957	0.0351222		1886	-0.120009	-0.25905	0.0350289
1887	-0.0678728	-0.196887	0.0743496		1887	-0.0678728	-0.196887	0.0743496		1887	-0.0678728	-0.196981	0.0742562
1888	-0.0402693	-0.164745	0.096551		1888	-0.0402693	-0.164745	0.096551		1888	-0.0402693	-0.164838	0.0964577
1889	-0.0101118	-0.128451	0.122655		1889	-0.0101118	-0.128451	0.122655		1889	-0.0101118	-0.128545	0.122562
1890	0.0066194	-0.108984	0.13798		1890	0.0066194	-0.108984	0.13798		1890	0.0066194	-0.109077	0.137886
1891	0.00681077	-0.107924	0.134592		1891	0.00681077	-0.107924	0.134592		1891	0.00681077	-0.108017	0.134499
1892	0.00535513	-0.110473	0.13416		1892	0.00535513	-0.110473	0.13416		1892	0.00535513	-0.110566	0.134066
1893	0.0277834	-0.0854278	0.155373		1893	0.0277834	-0.0854278	0.155373		1893	0.0277834	-0.0855212	0.15528
1894	0.048955	-0.0646817	0.173145		1894	0.048955	-0.0646817	0.173145		1894	0.048955	-0.0647751	0.173052
1895	0.0613585	-0.0528612	0.186524		1895	0.0613585	-0.0528612	0.186524		1895	0.0613585	-0.0529545	0.186431
1896	0.0709104	-0.0410126	0.191628		1896	0.0709104	-0.0410126	0.191628		1896	0.0709104	-0.0411059	0.191535
1897	0.0753426	-0.0351123	0.196392		1897	0.0753426	-0.0351123	0.196392		1897	0.0753426	-0.0352056	0.196299
1898	0.0793494	-0.0312571	0.198333		1898	0.0793494	-0.0312571	0.198333		1898	0.0793494	-0.0313504	0.19824
1899	0.0822812	-0.0275037	0.201227		1899	0.0822812	-0.0275037	0.201227		1899	0.0822812	-0.0275971	0.201134
1900	0.0860038	-0.0222526	0.205383		1900	0.0860038	-0.0222526	0.205383		1900	0.0860038	-0.022346	0.20529
1901	0.0881374	-0.0199382	0.2053		1901	0.0881374	-0.0199382	0.2053		1901	0.0881374	-0.0200316	0.205207
1902	0.089565	-0.0185789	0.207396		1902	0.089565	-0.0185789	0.207396		1902	0.089565	-0.0186722	0.207302
1903	0.063255	-0.0416963	0.18095		1903	0.063255	-0.0416963	0.18095		1903	0.063255	-0.0417896	0.180856
1904	0.0075824	-0.10539	0.135383		1904	0.0075824	-0.10539	0.135383		1904	0.0075824	-0.105483	0.13529
1905	0.0241776	-0.0906999	0.149478		1905	0.0241776	-0.0906999	0.149478		1905	0.0241776	-0.0907932	0.149384
1906	0.0576233	-0.0528145	0.178448		1906	0.0576233	-0.0528145	0.178448		1906	0.0576233	-0.0529078	0.178355
1907	0.0749996	-0.0293559	0.192373		1907	0.0749996	-0.0293559	0.192373		1907	0.0749996	-0.0294492	0.19228
1908	0.0773673	-0.0258481	0.194498		1908	0.0773673	-0.0258481	0.194498		1908	0.0773673	-0.0259414	0.194404
1909	0.0897178	-0.0139247	0.207322		1909	0.0897178	-0.0139247	0.207322		1909	0.0897178	-0.014018	0.207229
1910	0.100924	-0.00187231	0.219234		1910	0.100924	-0.00187231	0.219234		1910	0.100924	-0.00196564	0.21914
1911	0.110321	0.00626943	0.22652		1911	0.110321	0.00626943	0.22652		1911	0.110321	0.0061761	0.226426
1912	0.10114	-0.00325714	0.215483		1912	0.10114	-0.00325714	0.215483		1912	0.10114	-0.00335047	0.21539
1913	0.0567505	-0.0536266	0.174304		1913	0.0567505	-0.0536266	0.174304		1913	0.0567505	-0.05372	0.174211
1914	0.0475363	-0.0683638	0.169887		1914	0.0475363	-0.0683638	0.169887		1914	0.0475363	-0.0684571	0.169794
1915	0.0842473	-0.0275817	0.20403		1915	0.0842473	-0.0275817	0.20403		1915	0.0842473	-0.027675	0.203937
1916	0.117949	0.0129254	0.23125		1916	0.117949	0.0129254	0.23125		1916	0.117949	0.012832	0.231156
1917	0.140142	0.0384058	0.252087		1917	0.140142	0.0384058	0.252087		1917	0.140142	0.0383125	0.251993
1918	0.155335	0.0535861	0.266264		1918	0.155335	0.0535861	0.266264		1918	0.155335	0.0534928	0.266171
1919	0.166674	0.0667603	0.273245		1919	0.166674	0.0667603	0.273245		1919	0.166674	0.066667	0.273152
1920	0.172423	0.0747394	0.276253		1920	0.172423	0.0747394	0.276253		1920	0.172423	0.0746461	0.27616
1921	0.179813	0.0843125	0.282941		1921	0.179813	0.0843125	0.282941		1921	0.179813	0.0842192	0.282848
1922	0.18376	0.0891298	0.284796		1922	0.18376	0.0891298	0.284796		1922	0.18376	0.0890365	0.284703
1923	0.175799	0.079877	0.277492		1923	0.175799	0.079877	0.277492		1923	0.175799	0.0797837	0.277398
1924	0.182439	0.0878729	0.284937		1924	0.182439	0.0878729	0.284937		1924	0.182439	0.0877796	0.284844
1925	0.193788	0.100573	0.294159		1925	0.193788	0.100573	0.294159		1925	0.193788	0.10048	0.294066
1926	0.202521	0.110102	0.302009		1926	0.202521	0.110102	0.302009		1926	0.202521	0.110008	0.301916
1927	0.20957	0.117839	0.308177		1927	0.20957	0.117839	0.308177		1927	0.20957	0.117746	0.308084
1928	0.212933	0.121516	0.310741		1928	0.212933	0.121516	0.310741		1928	0.212933	0.121423	0.310647
1929	0.209031	0.119388	0.308256		1929	0.209031	0.119388	0.308256		1929	0.209031	0.119295	0.308162
1930	0.199245	0.110541	0.300544		1930	0.199245	0.110541	0.300544		1930	0.199245	0.110447	0.300451
1931	0.213166	0.12337	0.312901		1931	0.213166	0.12337	0.312901		1931	0.213166	0.123276	0.312807
1932	0.21561	0.125643	0.314981		1932	0.21561	0.125643	0.314981		1932	0.21561	0.12555	0.314887
1933	0.212368	0.123271	0.313837		1933	0.212368	0.123271	0.313837		1933	0.212368	0.123177	0.313744
1934	0.218783	0.129593	0.317756		1934	0.218783	0.129593	0.317756		1934	0.218783	0.129499	0.317663
1935	0.228303	0.13977	0.32513		1935	0.228303	0.13977	0.32513		1935	0.228303	0.139677	0.325037
1936	0.238781	0.153833	0.33652		1936	0.238781	0.153833	0.33652		1936	0.238781	0.15374	0.336426
1937	0.248765	0.164178	0.344945		1937	0.248765	0.164178	0.344945		1937	0.248765	0.164084	0.344851
1938	0.259032	0.174111	0.353254		1938	0.259032	0.174111	0.353254		1938	0.259032	0.174018	0.353161
1939	0.264263	0.180108	0.357182		1939	0.264263	0.180108	0.357182		1939	0.264263	0.180015	0.357088
1940	0.26825	0.185332	0.360207		1940	0.26825	0.185332	0.360207		1940	0.26825	0.185239	0.360114
1941	0.27033	0.187687	0.362758		1941	0.27033	0.187687	0.362758		1941	0.27033	0.187593	0.362664
1942	0.26991	0.187238	0.362547		1942	0.26991	0.187238	0.362547		1942	0.26991	0.187145	0.362454
1943	0.270366	0.186731	0.363232		1943	0.270366	0.186731	0.363232		1943	0.270366	0.186638	0.363139
1944	0.271049	0.186205	0.364197		1944	0.271049	0.186205	0.364197		1944	0.271049	0.186112	0.364104
1945	0.27914	0.193794	0.371947		1945	0.27914	0.193794	0.371947		1945	0.27914	0.193701	0.371854
1946	0.290381	0.208362	0.382096		1946	0.290381	0.208362	0.382096		1946	0.290381	0.208268	0.382003
1947	0.298794	0.216467	0.388861		1947	0.298794	0.216467	0.388861		1947	0.298794	0.216374	0.388768
1948	0.303164	0.221247	0.39215		1948	0.303164	0.221247	0.39215		1948	0.303164	0.221154	0.392057
1949	0.307689	0.226199	0.39596		1949	0.307689	0.226199	0.39596		1949	0.307689	0.226105	0.395867
1950	0.303125	0.22253	0.391505		1950	0.303125	0.22253	0.391505		1950	0.303125	0.222437	0.391412
1951	0.297413	0.214856	0.387864		1951	0.297413	0.214856	0.387864		1951	0.297413	0.214763	0.387771
1952	0.292137	0.208597	0.383603		1952	0.292137	0.208597	0.383603		1952	0.292137	0.208504	0.383509
1953	0.28922	0.205522	0.38154		1953	0.28922	0.205522	0.38154		1953	0.28922	0.205428	0.381447
1954	0.28832	0.202759	0.382864		1954	0.28832	0.202759	0.382864		1954	0.28832	0.202665	0.382771
1955	0.289585	0.203634	0.387167		1955	0.289585	0.203634	0.387167		1955	0.289585	0.203541	0.387074
1956	0.293055	0.208305	0.388929		1956	0.293055	0.208305	0.388929		1956	0.293055	0.208212	0.388836
1957	0.29865	0.211401	0.396461		1957	0.29865	0.211401	0.396461		1957	0.29865	0.211308	0.396367
1958	0.310253	0.223944	0.40826		1958	0.310253	0.223944	0.40826		1958	0.310253	0.22385	0.408166
1959	0.318432	0.233902	0.413407		1959	0.318432	0.233902	0.413407		1959	0.318432	0.233809	0.413314
1960	0.322739	0.238974	0.417293		1960	0.322739	0.238974	0.417293		1960	0.322739	0.238881	0.4172
1961	0.309288	0.222369	0.404659		1961	0.309288	0.222369	0.404659		1961	0.309288	0.222275	0.404565
1962	0.298829	0.208616	0.396914		1962	0.298829	0.208616	0.396914		1962	0.298829	0.208523	0.39682
1963	0.25873	0.165698	0.359088		1963	0.25873	0.165698	0.359088		1963	0.25873	0.165605	0.358995
1964	0.202665	0.100046	0.307944		1964	0.202665	0.100046	0.307944		1964	0.202665	0.0999526	0.30785
1965	0.182879	0.0711625	0.293991		1965	0.182879	0.0711625	0.293991		1965	0.182879	0.0710692	0.293897
1966	0.2042	0.0951741	0.317278		1966	0.2042	0.0951741	0.317278		1966	0.2042	0.0950808	0.317185
1967	0.239262	0.129771	0.34822		1967	0.239262	0.129771	0.34822		1967	0.239262	0.129677	0.348126
1968	0.250409	0.139524	0.356202		1968	0.250409	0.139524	0.356202		1968	0.250409	0.13943	0.356109
1969	0.270802	0.161691	0.37607		1969	0.270802	0.161691	0.37607		1969	0.270802	0.161597	0.375977
1970	0.289362	0.180236	0.394198		1970	0.289362	0.180236	0.394198		1970	0.289362	0.180142	0.394105
1971	0.305653	0.19691	0.408727		1971	0.305653	0.19691	0.408727		1971	0.305653	0.196817	0.408634
1972	0.310872	0.199985	0.417366		1972	0.310872	0.199985	0.417366		1972	0.310872	0.199891	0.417273
1973	0.334076	0.224164	0.440179		1973	0.334076	0.224164	0.440179		1973	0.334076	0.224071	0.440086
1974	0.358798	0.252015	0.463832		1974	0.358798	0.252015	0.463832		1974	0.358798	0.251922	0.463738
1975	0.367473	0.262524	0.468898		1975	0.367473	0.262524	0.468898		1975	0.367473	0.262431	0.468805
1976	0.35549	0.249137	0.456989		1976	0.35549	0.249137	0.456989		1976	0.35549	0.249044	0.456896
1977	0.383434	0.277397	0.486847		1977	0.383434	0.277397	0.486847		1977	0.383434	0.277304	0.486754
1978	0.420307	0.315485	0.52098		1978	0.420307	0.315485	0.52098		1978	0.420307	0.315391	0.520887
1979	0.456385	0.35943	0.553163		1979	0.456385	0.35943	0.553163		1979	0.456385	0.359337	0.553069
1980	0.483913	0.389386	0.576743		1980	0.483913	0.389386	0.576743		1980	0.483913	0.389293	0.57665
1981	0.505655	0.415438	0.593066		1981	0.505655	0.415438	0.593066		1981	0.505655	0.415345	0.592973
1982	0.501534	0.414059	0.585265		1982	0.501534	0.414059	0.585265		1982	0.501534	0.413966	0.585172
1983	0.474444	0.38139	0.562108		1983	0.474444	0.38139	0.562108		1983	0.474444	0.381297	0.562015
1984	0.435664	0.333316	0.529934		1984	0.435664	0.333316	0.529934		1984	0.435664	0.333223	0.52984
1985	0.465702	0.36202	0.561341		1985	0.465702	0.36202	0.561341		1985	0.465702	0.361927	0.561247
1986	0.503542	0.408495	0.59159		1986	0.503542	0.408495	0.59159		1986	0.503542	0.408401	0.591497
1987	0.528099	0.439441	0.610342		1987	0.528099	0.439441	0.610342		1987	0.528099	0.439348	0.610249
1988	0.563477	0.481711	0.639338		1988	0.563477	0.481711	0.639338		1988	0.563477	0.481617	0.639244
1989	0.608486	0.533297	0.677625		1989	0.608486	0.533297	0.677625		1989	0.608486	0.533204	0.677532
1990	0.642705	0.574564	0.703762		1990	0.642705	0.574564	0.703762		1990	0.642705	0.574471	0.703668
1991	0.63016	0.568944	0.682732		1991	0.63016	0.568944	0.682732		1991	0.63016	0.568851	0.682639
1992	0.561165	0.483132	0.627995		1992	0.561165	0.483132	0.627995		1992	0.561165	0.483039	0.627902
1993	0.447916	0.318936	0.550776		1993	0.447916	0.318936	0.550776		1993	0.447916	0.318843	0.550682
1994	0.470792	0.338494	0.573201		1994	0.470792	0.338494	0.573201		1994	0.470792	0.338401	0.573108
1995	0.548173	0.453378	0.629311		1995	0.548173	0.453378	0.629311		1995	0.548173	0.453285	0.629217
1996	0.611225	0.536869	0.674245		1996	0.611225	0.536869	0.674245		1996	0.611225	0.536776	0.674152
1997	0.63855	0.578133	0.693531		1997	0.63855	0.578133	0.693531		1997	0.63855	0.578039	0.693438
1998	0.677114	0.619485	0.727951		1998	0.677114	0.619485	0.727951		1998	0.677114	0.619392	0.727858
1999	0.728532	0.681343	0.767196		1999	0.728532	0.681343	0.767196		1999	0.728532	0.68125	0.767103
2000	0.77168	0.735492	0.799844		2000	0.77168	0.735492	0.799844		2000	0.77168	0.735398	0.799751
2001	0.803759	0.776211	0.832159		2001	0.803759	0.776211	0.832159		2001	0.803759	0.776118	0.832066
2002	0.825027	0.800793	0.85068		2002	0.825027	0.800793	0.85068		2002	0.825027	0.8007	0.850586
2003	0.843209	0.824386	0.864489		2003	0.843209	0.824386	0.864489		2003	0.843209	0.824293	0.864396
2004	0.858175	0.844396	0.876069		2004	0.858175	0.844396	0.876069		2004	0.858175	0.844302	0.875975
2005	0.870535	0.858295	0.887231		2005	0.870535	0.858295	0.887231		2005	0.870535	0.858202	0.887138
2006	0.884597	0.872318	0.900902		2006	0.884597	0.872318	0.900902		2006	0.884597	0.872225	0.900809
2007	0.900233	0.885116	0.918585		2007	0.900233	0.885116	0.918585		2007	0.900233	0.885023	0.918492
2008	0.926559	0.905387	0.950894		2008	0.926559	0.905387	0.950894		2008	0.926559	0.905294	0.950801
2009	0.952774	0.923879	0.985435		2009	0.952774	0.923879	0.985435		2009	0.952774	0.923786	0.985342
2010	0.973036	0.938323	1.01315		2010	0.973036	0.938323	1.01315		2010	0.973036	0.938229	1.01305
2011	1.005	0.963564	1.05273		2011	1.005	0.963564	1.05273		2011	1.005	0.963471	1.05264
2012	1.03124	0.981599	1.08673		2012	1.03124	0.981599	1.08673		2012	1.03124	0.981506	1.08664
2013	1.0631	1.00445	1.12953		2013	1.0631	1.00445	1.12953		2013	1.0631	1.00436	1.12944
2014	1.08936	1.02279	1.16795		2014	1.08936	1.02279	1.16795		2014	1.08936	1.02269	1.16786
2015	1.11187	1.04005	1.19757		2015	1.11181	1.03998	1.1975		2015	1.11152	1.03952	1.19706
2016	1.13388	1.05573	1.2298		2016	1.13325	1.05543	1.22959		2016	1.1307	1.05294	1.22556
2017	1.15708	1.0707	1.26095		2017	1.15609	1.0697	1.25665		2017	1.15082	1.06705	1.25119
2018	1.18141	1.08906	1.29339		2018	1.18058	1.08608	1.2939		2018	1.17284	1.0833	1.28078
2019	1.20647	1.10433	1.32675		2019	1.20629	1.10229	1.32985		2019	1.19637	1.0995	1.31384
2020	1.23278	1.12119	1.36248		2020	1.23284	1.12112	1.36868		2020	1.22209	1.11686	1.35084
2021	1.26205	1.13946	1.4024		2021	1.26117	1.141	1.4078		2021	1.25191	1.13794	1.39145
2022	1.29366	1.15714	1.44716		2022	1.29161	1.16208	1.44807		2022	1.2848	1.16202	1.43254
2023	1.32477	1.17434	1.49313		2023	1.32175	1.18226	1.48846		2023	1.31789	1.18685	1.47549
2024	1.35366	1.18976	1.53901		2024	1.34997	1.20005	1.52699		2024	1.34957	1.20963	1.51897
2025	1.37838	1.20172	1.57767		2025	1.37426	1.21522	1.56195		2025	1.37792	1.2283	1.55806
2026	1.40074	1.21237	1.61274		2026	1.39635	1.2313	1.59184		2026	1.40468	1.2458	1.59361
2027	1.4214	1.22175	1.64467		2027	1.41697	1.24547	1.62237		2027	1.43055	1.26488	1.62836
2028	1.44222	1.23152	1.67655		2028	1.43799	1.26002	1.65285		2028	1.45735	1.28354	1.66288
2029	1.46258	1.24114	1.70606		2029	1.45885	1.27409	1.67697		2029	1.48444	1.3025	1.69643
2030	1.48214	1.25087	1.73476		2030	1.48061	1.28889	1.70527		2030	1.51236	1.32146	1.7323
2031	1.50012	1.26026	1.76262		2031	1.50386	1.30439	1.73724		2031	1.54116	1.34127	1.77203
2032	1.51851	1.2704	1.79509		2032	1.52877	1.32139	1.77047		2032	1.5715	1.36422	1.80992
2033	1.5392	1.28179	1.82732		2033	1.55663	1.33986	1.80584		2033	1.60488	1.38729	1.85154
2034	1.5629	1.29464	1.8637		2034	1.58815	1.3607	1.84594		2034	1.64217	1.41762	1.90068
2035	1.58522	1.30622	1.89797		2035	1.61891	1.38082	1.88485		2035	1.67897	1.44519	1.95219
2036	1.60675	1.31754	1.93179		2036	1.64952	1.4002	1.92357		2036	1.71589	1.47308	1.99936
2037	1.6248	1.32674	1.96029		2037	1.67728	1.41705	1.96514		2037	1.75022	1.49945	2.04061
2038	1.64123	1.33538	1.98752		2038	1.70401	1.43382	2.00646		2038	1.78381	1.52389	2.08313
2039	1.65473	1.34226	2.0085		2039	1.72838	1.44859	2.04005		2039	1.81532	1.54587	2.12448
2040	1.66541	1.34771	2.02884		2040	1.75078	1.46225	2.07103		2040	1.84502	1.56709	2.17032
2041	1.6742	1.35201	2.04471		2041	1.77238	1.4768	2.10138		2041	1.87403	1.58997	2.20533
2042	1.68299	1.35245	2.06027		2042	1.79489	1.49233	2.13139		2042	1.90404	1.61311	2.24048
2043	1.69268	1.35598	2.07776		2043	1.8189	1.50908	2.16404		2043	1.93578	1.63644	2.2869
2044	1.70372	1.36229	2.09726		2044	1.84475	1.52755	2.19847		2044	1.96964	1.66372	2.33027
2045	1.71785	1.3722	2.11937		2045	1.8741	1.5482	2.23819		2045	2.00729	1.69434	2.3725
2046	1.73313	1.37996	2.1419		2046	1.90493	1.56864	2.28172		2046	2.04673	1.72451	2.4199
2047	1.74889	1.38687	2.16497		2047	1.93653	1.58732	2.32624		2047	2.08724	1.75106	2.46546
2048	1.76261	1.39244	2.18818		2048	1.96633	1.60658	2.36557		2048	2.12627	1.77719	2.5213
2049	1.77205	1.39582	2.20573		2049	1.99201	1.62291	2.4052		2049	2.16149	1.80215	2.56715
2050	1.77691	1.39688	2.21649		2050	2.01327	1.6364	2.4409		2050	2.19302	1.82351	2.60624
2051	1.78004	1.39759	2.22388		2051	2.0331	1.64959	2.47523		2051	2.22417	1.84504	2.64394
2052	1.78273	1.39815	2.23219		2052	2.05256	1.66206	2.5079		2052	2.25563	1.86821	2.68511
2053	1.78538	1.39877	2.23834		2053	2.072	1.67404	2.53774		2053	2.2876	1.89206	2.72146
2054	1.7894	1.40007	2.2489		2054	2.09282	1.68811	2.57153		2054	2.32149	1.91517	2.76332
2055	1.796	1.40259	2.26145		2055	2.11631	1.70368	2.60821		2055	2.35855	1.94223	2.81699
2056	1.80483	1.40596	2.27588		2056	2.1421	1.72035	2.64745		2056	2.39841	1.97243	2.87509
2057	1.81254	1.40833	2.28954		2057	2.1668	1.73604	2.68543		2057	2.43766	2.00133	2.92654
2058	1.81918	1.41028	2.30204		2058	2.19047	1.75139	2.71798		2058	2.47631	2.02972	2.97818
2059	1.82524	1.41241	2.31382		2059	2.2136	1.76648	2.74948		2059	2.51485	2.05794	3.02685
2060	1.82826	1.41262	2.32291		2060	2.23376	1.77967	2.77772		2060	2.55101	2.08338	3.07825
2061	1.82884	1.4112	2.32909		2061	2.25161	1.79149	2.8029		2061	2.58552	2.10739	3.12855
2062	1.8283	1.40977	2.33369		2062	2.26847	1.8016	2.82719		2062	2.61964	2.13125	3.17808
2063	1.82795	1.40857	2.33775		2063	2.28563	1.81287	2.85869		2063	2.65459	2.15622	3.22939
2064	1.82811	1.40754	2.34143		2064	2.30339	1.82492	2.89065		2064	2.69062	2.18231	3.28033
2065	1.82925	1.40674	2.34634		2065	2.32224	1.83776	2.92351		2065	2.72818	2.20999	3.3332
2066	1.83316	1.4079	2.35338		2066	2.34398	1.85211	2.95892		2066	2.76909	2.24121	3.38968
2067	1.83884	1.41015	2.36402		2067	2.36762	1.86739	2.9959		2067	2.81234	2.27437	3.44311
2068	1.84424	1.41209	2.37096		2068	2.39107	1.88205	3.02957		2068	2.85579	2.30721	3.49719
2069	1.84724	1.41231	2.37739		2069	2.41216	1.89492	3.0598		2069	2.89726	2.33756	3.55468
2070	1.8474	1.41049	2.38117		2070	2.4303	1.90561	3.08831		2070	2.93619	2.36525	3.61215
2071	1.84507	1.40694	2.38242		2071	2.44568	1.91456	3.11436		2071	2.97288	2.39095	3.66762
2072	1.84209	1.40301	2.38094		2072	2.46039	1.92325	3.13908		2072	3.0093	2.41687	3.72269
2073	1.83909	1.39914	2.38091		2073	2.47513	1.9316	3.16365		2073	3.04623	2.44345	3.77803
2074	1.83553	1.39547	2.38026		2074	2.48932	1.93987	3.18101		2074	3.08311	2.47029	3.83134
2075	1.832	1.39178	2.37936		2075	2.50353	1.94831	3.20442		2075	3.12056	2.49978	3.88073
2076	1.82848	1.38797	2.38101		2076	2.51776	1.95663	3.22756		2076	3.15857	2.5273	3.94675
2077	1.82584	1.38457	2.38073		2077	2.53286	1.96541	3.24781		2077	3.19804	2.55571	4.0042
2078	1.82494	1.38194	2.38176		2078	2.54976	1.97492	3.27006		2078	3.23989	2.58578	4.06402
2079	1.82532	1.37975	2.38395		2079	2.56798	1.98485	3.2893		2079	3.28365	2.61862	4.12687
2080	1.8257	1.37737	2.38613		2080	2.58635	1.99476	3.3104		2080	3.32807	2.65205	4.1909
2081	1.82455	1.37411	2.38682		2081	2.60349	2.00436	3.33507		2081	3.3716	2.68431	4.24938
2082	1.82201	1.37021	2.38596		2082	2.61922	2.01312	3.35807		2082	3.41419	2.71575	4.30403
2083	1.81736	1.36523	2.38267		2083	2.63267	2.02037	3.38004		2083	3.45501	2.74526	4.35661
2084	1.81186	1.36	2.37762		2084	2.64506	2.02697	3.40352		2084	3.49528	2.77451	4.40828
2085	1.80461	1.35376	2.37061		2085	2.65546	2.0324	3.42284		2085	3.53406	2.80328	4.45827
2086	1.79675	1.34736	2.3625		2086	2.66499	2.03778	3.43605		2086	3.57248	2.83052	4.5163
2087	1.78978	1.34147	2.35491		2087	2.67521	2.04351	3.45203		2087	3.61215	2.85854	4.5756
2088	1.78374	1.33593	2.34852		2088	2.68615	2.04834	3.47326		2088	3.65312	2.8941	4.64188
2089	1.7796	1.33141	2.34455		2089	2.69882	2.05511	3.49521		2089	3.69639	2.925	4.71243
2090	1.77812	1.32843	2.34286		2090	2.71359	2.06391	3.51787		2090	3.74269	2.95768	4.77827
2091	1.77789	1.32785	2.34232		2091	2.72871	2.07234	3.53997		2091	3.79051	2.99444	4.84501
2092	1.77881	1.32694	2.34294		2092	2.74437	2.08144	3.56192		2092	3.8397	3.03642	4.91389
2093	1.77715	1.32243	2.34222		2093	2.75687	2.08833	3.58144		2093	3.88632	3.0701	4.97909
2094	1.77202	1.31544	2.34263		2094	2.7653	2.09248	3.59798		2094	3.92933	3.10103	5.03867
2095	1.76524	1.30764	2.3346		2095	2.77156	2.09457	3.61283		2095	3.9706	3.12761	5.09535
2096	1.75741	1.29935	2.3244		2096	2.77628	2.09657	3.62637		2096	4.01081	3.15469	5.1502
2097	1.75015	1.29291	2.31794		2097	2.78116	2.09916	3.63542		2097	4.05165	3.18094	5.20563
2098	1.74358	1.28677	2.31206		2098	2.78636	2.10155	3.64295		2098	4.09332	3.20818	5.26214
2099	1.73889	1.28169	2.30776		2099	2.7931	2.10502	3.65237		2099	4.13709	3.23822	5.32153
2100	1.73643	1.27774	2.30522		2100	2.80215	2.11017	3.66567		2100	4.18385	3.27228	5.38648
2101	1.7354	1.27457	2.30358		2101	2.81297	2.1167	3.68217		2101	4.23324	3.30973	5.45499
2102	1.73279	1.27051	2.30045		2102	2.82223	2.12184	3.69731		2102	4.28134	3.3434	5.52284
2103	1.72873	1.26603	2.29589		2103	2.82991	2.12599	3.71117		2103	4.32773	3.37517	5.58927
2104	1.72307	1.26093	2.28988		2104	2.83581	2.12927	3.7237		2104	4.37207	3.4045	5.65396
2105	1.71533	1.25478	2.28197		2105	2.83941	2.13113	3.7344		2105	4.4137	3.43651	5.71628
2106	1.70703	1.24908	2.27341		2106	2.84228	2.13235	3.74443		2106	4.45418	3.46143	5.77303
2107	1.69889	1.24354	2.26488		2107	2.84517	2.13366	3.75431		2107	4.49426	3.48635	5.82875
2108	1.69169	1.23724	2.25706		2108	2.84888	2.13559	3.76459		2108	4.53481	3.51243	5.88461
2109	1.68594	1.23253	2.25036		2109	2.85398	2.13849	3.7749		2109	4.5764	3.54035	5.94111
2110	1.68258	1.22948	2.24571		2110	2.86143	2.14322	3.78495		2110	4.62006	3.57154	5.99909
2111	1.68315	1.23024	2.24456		2111	2.87283	2.15147	3.79825		2111	4.6675	3.60846	6.05999
2112	1.68267	1.22806	2.24727		2112	2.8831	2.15658	3.81103		2112	4.71345	3.64226	6.11955
2113	1.6806	1.22531	2.24782		2113	2.89156	2.16123	3.8221		2113	4.75714	3.67262	6.17688
2114	1.67528	1.22086	2.24399		2114	2.89654	2.1637	3.8303		2114	4.79678	3.69707	6.23204
2115	1.66912	1.21648	2.23876		2115	2.90047	2.16593	3.83729		2115	4.83484	3.72017	6.28496
2116	1.6617	1.21105	2.23179		2116	2.903	2.16755	3.84307		2116	4.87103	3.74105	6.33516
2117	1.65407	1.20412	2.22171		2117	2.90518	2.16913	3.84839		2117	4.90642	3.76148	6.38415
2118	1.64695	1.19714	2.21163		2118	2.9078	2.17093	3.85398		2118	4.94188	3.78256	6.43324
2119	1.64085	1.19212	2.2031		2119	2.91141	2.17321	3.86005		2119	4.978	3.80506	6.4833
2120	1.63737	1.18917	2.19946		2120	2.91766	2.17686	3.86682		2120	5.0165	3.8315	6.53696
2121	1.63694	1.19026	2.19935		2121	2.92702	2.18196	3.87579		2121	5.05798	3.85768	6.59517
2122	1.63875	1.19105	2.20211		2122	2.93866	2.18803	3.89062		2122	5.10157	3.8886	6.65675
2123	1.63707	1.18726	2.20178		2123	2.94661	2.19174	3.90415		2123	5.14103	3.91472	6.7126
2124	1.63435	1.18465	2.19989		2124	2.95332	2.1954	3.91362		2124	5.17877	3.93954	6.76583
2125	1.62894	1.17987	2.19495		2125	2.95714	2.19732	3.92072		2125	5.21312	3.95993	6.81423
2126	1.6214	1.17427	2.18725		2126	2.95864	2.19733	3.92563		2126	5.24461	3.97929	6.85834
2127	1.61392	1.16834	2.17908		2127	2.96008	2.19745	3.93025		2127	5.27563	4.0003	6.90193
2128	1.6069	1.1613	2.17124		2128	2.96194	2.19794	3.93517		2128	5.30674	4.01781	6.94854
2129	1.60126	1.15691	2.16491		2129	2.96518	2.19946	3.94119		2129	5.33896	4.03737	6.99769
2130	1.59836	1.15421	2.16169		2130	2.97121	2.20299	3.94954		2130	5.37383	4.06121	7.05166
2131	1.60045	1.15842	2.16416		2131	2.98241	2.21026	3.96225		2131	5.4139	4.09298	7.11503
2132	1.60214	1.15924	2.1671		2132	2.9932	2.21693	3.97517		2132	5.45339	4.12121	7.17489
2133	1.60262	1.15882	2.16889		2133	3.00265	2.22218	3.98696		2133	5.4912	4.14625	7.23064
2134	1.60019	1.15634	2.16751		2134	3.00898	2.22516	3.9962		2134	5.52544	4.16856	7.27624
2135	1.59464	1.15168	2.16278		2135	3.01195	2.22652	4.00245		2135	5.55579	4.1878	7.31928
2136	1.58671	1.14469	2.15457		2136	3.01234	2.22587	4.00631		2136	5.58302	4.20029	7.36191
2137	1.57925	1.13519	2.14594		2137	3.01313	2.22571	4.0102		2137	5.61029	4.21403	7.40463
2138	1.57257	1.13031	2.13836		2138	3.01469	2.22619	4.01633		2138	5.63809	4.22911	7.44774
2139	1.56663	1.12545	2.13176		2139	3.017	2.22715	4.02309		2139	5.6664	4.24521	7.49136
2140	1.56194	1.12186	2.12662		2140	3.02057	2.22895	4.03068		2140	5.6958	4.26314	7.52803
2141	1.55977	1.11965	2.12469		2141	3.02674	2.23254	4.03998		2141	5.72772	4.28506	7.56665
2142	1.55961	1.11931	2.12611		2142	3.03497	2.23747	4.05064		2142	5.76164	4.30978	7.60718
2143	1.55889	1.11784	2.12751		2143	3.04257	2.24181	4.06093		2143	5.79473	4.3327	7.64758
2144	1.55767	1.11616	2.12828		2144	3.04951	2.24566	4.07075		2144	5.82686	4.35422	7.68728
2145	1.55558	1.11397	2.12794		2145	3.05542	2.24882	4.07989		2145	5.85764	4.37392	7.73021
2146	1.55143	1.1105	2.12494		2146	3.05907	2.25041	4.08751		2146	5.88573	4.39201	7.77036
2147	1.54735	1.1073	2.12127		2147	3.06261	2.25205	4.09496		2147	5.91338	4.40668	7.80979
2148	1.5428	1.10262	2.11696		2148	3.06558	2.25332	4.10206		2148	5.94017	4.42215	7.84802
2149	1.53819	1.09833	2.11234		2149	3.06837	2.25449	4.10898		2149	5.96648	4.43829	7.88554
2150	1.53408	1.09514	2.10824		2150	3.07156	2.25597	4.11614		2150	5.99298	4.45497	7.9233
2151	1.53068	1.09232	2.10505		2151	3.07539	2.25789	4.12372		2151	6.01992	4.47259	7.96169
2152	1.52946	1.09074	2.10334		2152	3.0814	2.26132	4.13272		2152	6.04897	4.49167	8.00306
2153	1.53157	1.09243	2.1044		2153	3.09083	2.26708	4.14402		2153	6.0815	4.51523	8.04948
2154	1.53526	1.09279	2.10724		2154	3.10184	2.2738	4.15647		2154	6.11567	4.5435	8.0984
2155	1.53706	1.09436	2.10879		2155	3.11079	2.27816	4.1676		2155	6.14755	4.56741	8.14421
2156	1.53685	1.0943	2.10847		2156	3.11747	2.2813	4.17713		2156	6.17681	4.58835	8.1863
2157	1.53446	1.09166	2.10624		2157	3.12171	2.28328	4.18501		2157	6.20324	4.60362	8.22443
2158	1.52987	1.08656	2.10181		2158	3.1235	2.28411	4.19116		2158	6.22679	4.61684	8.26008
2159	1.52423	1.08044	2.09587		2159	3.12404	2.28428	4.19639		2159	6.24873	4.62924	8.29613
2160	1.51892	1.0761	2.09034		2160	3.1248	2.28412	4.20168		2160	6.27065	4.642	8.33166
2161	1.51507	1.07332	2.08609		2161	3.12699	2.28498	4.20787		2161	6.29391	4.65605	8.36845
2162	1.51387	1.07195	2.08453		2162	3.13188	2.2877	4.21583		2162	6.31991	4.67236	8.40835
2163	1.51633	1.07375	2.08759		2163	3.14053	2.29296	4.22629		2163	6.34985	4.6918	8.45304
2164	1.52126	1.07872	2.09388		2164	3.15173	2.29877	4.23854		2164	6.38253	4.71676	8.5015
2165	1.52327	1.07897	2.09758		2165	3.1598	2.30215	4.2496		2165	6.41184	4.74189	8.5542
2166	1.52409	1.07865	2.09971		2166	3.16643	2.30525	4.26032		2166	6.4394	4.76397	8.60285
2167	1.5212	1.07529	2.09769		2167	3.16905	2.30607	4.267		2167	6.46248	4.77889	8.63669
2168	1.51605	1.07062	2.09266		2168	3.1691	2.30597	4.27073		2168	6.4825	4.78894	8.67364
2169	1.51059	1.06599	2.08687		2169	3.16868	2.30578	4.27375		2169	6.50177	4.79797	8.71568
2170	1.50574	1.06181	2.08157		2170	3.16879	2.30586	4.27771		2170	6.52139	4.80793	8.75765
2171	1.50201	1.05788	2.07728		2171	3.16998	2.30618	4.28288		2171	6.542	4.81993	8.80008
2172	1.50026	1.05624	2.07537		2172	3.17315	2.30769	4.28932		2172	6.56462	4.83548	8.84371
2173	1.50192	1.05806	2.07708		2173	3.17984	2.3113	4.29809		2173	6.59094	4.85716	8.8898
2174	1.50486	1.06009	2.08207		2174	3.18784	2.31491	4.30978		2174	6.61867	4.87932	8.93635
2175	1.50804	1.06223	2.08672		2175	3.19598	2.31855	4.32173		2175	6.64651	4.89815	8.98299
2176	1.51	1.06278	2.09018		2176	3.20274	2.32141	4.33238		2176	6.67279	4.9144	9.02849
2177	1.50936	1.06083	2.09073		2177	3.20663	2.32279	4.34009		2177	6.69585	4.9261	9.07155
2178	1.50623	1.05703	2.08757		2178	3.20773	2.32288	4.34693		2178	6.71569	4.93377	9.11202
2179	1.50242	1.05339	2.08175		2179	3.20796	2.32279	4.35301		2179	6.73431	4.94061	9.15128
2180	1.4983	1.04963	2.07633		2180	3.20775	2.32139	4.35816		2180	6.75226	4.94677	9.18976
2181	1.49446	1.0463	2.07398		2181	3.20771	2.31996	4.36299		2181	6.77022	4.95339	9.22797
2182	1.491	1.04268	2.07177		2182	3.20798	2.3188	4.36653		2182	6.78834	4.9604	9.26607
2183	1.4882	1.04007	2.06995		2183	3.20883	2.31813	4.36997		2183	6.80696	4.96833	9.3043
2184	1.48655	1.03858	2.0689		2184	3.21082	2.31834	4.37429		2184	6.82667	4.97796	9.34314
2185	1.48673	1.0386	2.06913		2185	3.21464	2.31996	4.38012		2185	6.84826	4.99037	9.38323
2186	1.49003	1.04064	2.07162		2186	3.22168	2.32404	4.38867		2186	6.87328	5.00771	9.42372
2187	1.49303	1.04297	2.07381		2187	3.22838	2.32746	4.39708		2187	6.89797	5.0234	9.46169
2188	1.4956	1.04475	2.07596		2188	3.23446	2.3305	4.40498		2188	6.92191	5.03848	9.49894
2189	1.49797	1.04595	2.07811		2189	3.24022	2.33322	4.41342		2189	6.94535	5.05436	9.54438
2190	1.49742	1.04365	2.07822		2190	3.24278	2.33319	4.41963		2190	6.96524	5.06514	9.58715
2191	1.49475	1.04031	2.07702		2191	3.24293	2.33141	4.42313		2191	6.98227	5.07285	9.61498
2192	1.49167	1.03713	2.07554		2192	3.24251	2.32951	4.42584		2192	6.99842	5.08024	9.64067
2193	1.48927	1.03442	2.07445		2193	3.24272	2.3283	4.42907		2193	7.01507	5.08883	9.66621
2194	1.48761	1.03265	2.07374		2194	3.24367	2.32769	4.43301		2194	7.03238	5.09849	9.69048
2195	1.48734	1.03198	2.07398		2195	3.24604	2.3282	4.43936		2195	7.0511	5.11023	9.71668
2196	1.49012	1.03376	2.07638		2196	3.2516	2.3312	4.4476		2196	7.07318	5.12652	9.74747
2197	1.49532	1.03955	2.08046		2197	3.25973	2.33602	4.45861		2197	7.09805	5.14612	9.78263
2198	1.50069	1.04378	2.09023		2198	3.26802	2.34081	4.4706		2198	7.12313	5.16526	9.8238
2199	1.50351	1.04591	2.0963		2199	3.27357	2.34314	4.47993		2199	7.14521	5.17978	9.86786
2200	1.50367	1.04497	2.09808		2200	3.27623	2.34315	4.48617		2200	7.16398	5.18918	9.90803
2201	1.50122	1.04114	2.09569		2201	3.27602	2.341	4.48925		2201	7.17942	5.19666	9.94107
2202	1.4984	1.03741	2.09245		2202	3.27532	2.33882	4.49143		2202	7.19405	5.2032	9.96536
2203	1.4959	1.0343	2.08973		2203	3.27492	2.33701	4.49515		2203	7.20882	5.21035	9.99002
2204	1.493	1.03063	2.08649		2204	3.27405	2.33487	4.49929		2204	7.22295	5.21672	10.0136
2205	1.49046	1.0275	2.08376		2205	3.27353	2.33317	4.50357		2205	7.2373	5.22373	10.0375
2206	1.48823	1.02521	2.08191		2206	3.2733	2.33169	4.50799		2206	7.25186	5.2311	10.0617
2207	1.48724	1.02425	2.08169		2207	3.27432	2.33124	4.51063		2207	7.26767	5.24037	10.0878
2208	1.48842	1.02507	2.0843		2208	3.27762	2.33252	4.51616		2208	7.28585	5.25154	10.1183
2209	1.49133	1.02782	2.09016		2209	3.28274	2.33506	4.52462		2209	7.30602	5.26215	10.1523
2210	1.49482	1.03015	2.09705		2210	3.28846	2.33797	4.53423		2210	7.32683	5.27287	10.1877
2211	1.49714	1.03156	2.10224		2211	3.2929	2.33967	4.54212		2211	7.34622	5.28251	10.2206
2212	1.49829	1.03203	2.1055		2212	3.29602	2.34032	4.54803		2212	7.36404	5.29121	10.2506
2213	1.49752	1.03009	2.1058		2213	3.29705	2.33929	4.55073		2213	7.37944	5.29846	10.2765
2214	1.49596	1.02759	2.10467		2214	3.29715	2.33771	4.55179		2214	7.39362	5.3052	10.3001
2215	1.49276	1.02293	2.10111		2215	3.29547	2.33473	4.54982		2215	7.40571	5.31073	10.3202
2216	1.48912	1.01994	2.09668		2216	3.29322	2.33158	4.54898		2216	7.41697	5.31597	10.3387
2217	1.48658	1.01795	2.09389		2217	3.29209	2.32948	4.54829		2217	7.42926	5.32198	10.359
2218	1.48522	1.01671	2.09302		2218	3.29218	2.32833	4.54863		2218	7.44277	5.32869	10.3817
2219	1.48602	1.01711	2.09547		2219	3.29452	2.32892	4.55294		2219	7.45865	5.33679	10.4086
2220	1.48937	1.01938	2.10197		2220	3.29955	2.33148	4.56217		2220	7.47745	5.34646	10.4406
2221	1.49379	1.02248	2.10882		2221	3.30571	2.33479	4.57369		2221	7.4975	5.35655	10.475
2222	1.49957	1.02798	2.11648		2222	3.31326	2.3391	4.58557		2222	7.51906	5.36737	10.5119
2223	1.50245	1.02988	2.12131		2223	3.31774	2.34056	4.59349		2223	7.53733	5.37576	10.5434
2224	1.5017	1.0277	2.12194		2224	3.31827	2.33892	4.59704		2224	7.55109	5.38153	10.5667
2225	1.49908	1.02382	2.12003		2225	3.31669	2.33586	4.5965		2225	7.56228	5.3861	10.5856
2226	1.49506	1.01836	2.11626		2226	3.31353	2.33174	4.59468		2226	7.57151	5.38973	10.601
2227	1.49167	1.01544	2.1129		2227	3.31097	2.32837	4.59439		2227	7.58115	5.39391	10.6172
2228	1.48868	1.01294	2.11001		2228	3.30879	2.32538	4.59463		2228	7.59106	5.39827	10.634
2229	1.48759	1.01207	2.10921		2229	3.30857	2.32408	4.5971		2229	7.60301	5.404	10.6543
2230	1.48948	1.01331	2.11184		2230	3.3115	2.32518	4.60329		2230	7.61832	5.41152	10.6806
2231	1.4926	1.01496	2.11623		2231	3.31575	2.32712	4.61133		2231	7.63514	5.41963	10.7097
2232	1.49501	1.01578	2.12015		2232	3.31923	2.32822	4.61601		2232	7.65112	5.42696	10.7373
2233	1.49733	1.01765	2.1239		2233	3.32253	2.32917	4.61967		2233	7.66681	5.4341	10.7644
2234	1.4978	1.01711	2.12569		2234	3.32383	2.32838	4.62211		2234	7.68026	5.43974	10.7877
2235	1.4968	1.0151	2.12564		2235	3.32347	2.32638	4.62347		2235	7.69171	5.44432	10.8074
2236	1.49383	1.01162	2.12327		2236	3.32095	2.32272	4.62341		2236	7.70063	5.44757	10.8228
2237	1.49068	1.00899	2.12107		2237	3.31816	2.31909	4.62304		2237	7.709	5.45085	10.8371
2238	1.4881	1.0064	2.12082		2238	3.3159	2.31602	4.62288		2238	7.7178	5.45446	10.8522
2239	1.48651	1.00335	2.1212		2239	3.31465	2.31384	4.62323		2239	7.72759	5.45864	10.8692
2240	1.48669	1.003	2.1227		2240	3.31525	2.31308	4.62466		2240	7.73931	5.46386	10.8895
2241	1.48987	1.00599	2.12611		2241	3.31899	2.31477	4.62805		2241	7.75444	5.4709	10.9159
2242	1.49493	1.01	2.13082		2242	3.32474	2.31787	4.63276		2242	7.77183	5.47888	10.9464
2243	1.49874	1.01203	2.13486		2243	3.32917	2.31957	4.63675		2243	7.78786	5.48569	10.9747
2244	1.50064	1.01232	2.13766		2244	3.33148	2.31952	4.63947		2244	7.80147	5.49192	10.9986
2245	1.4998	1.01062	2.13872		2245	3.3308	2.31708	4.64034		2245	7.81167	5.4957	11.0166
2246	1.49693	1.00778	2.13841		2246	3.32787	2.31304	4.63971		2246	7.81913	5.49765	11.0298
2247	1.49405	1.00396	2.13801		2247	3.32483	2.30918	4.63888		2247	7.82623	5.49959	11.0423
2248	1.4909	0.999855	2.13746		2248	3.32147	2.30514	4.63773		2248	7.83282	5.50129	11.054
2249	1.48786	0.996767	2.13695		2249	3.31819	2.30133	4.63649		2249	7.83932	5.50314	11.0718
2250	1.48505	0.99394	2.13643		2250	3.31502	2.29777	4.63495		2250	7.84546	5.505	11.09
2251	1.48275	0.991818	2.13592		2251	3.31211	2.29465	4.63301		2251	7.85112	5.50664	11.107
2252	1.48191	0.991335	2.13614		2252	3.31064	2.29283	4.63165		2252	7.85792	5.50947	11.124
2253	1.48321	0.992859	2.13765		2253	3.31146	2.29282	4.63158		2253	7.86704	5.51435	11.1421
2254	1.4863	0.99569	2.14029		2254	3.31422	2.29423	4.63262		2254	7.87825	5.52077	11.1612
2255	1.48865	0.996896	2.14254		2255	3.31628	2.29488	4.63326		2255	7.88869	5.52646	11.1795
2256	1.49034	0.997929	2.1443		2256	3.31765	2.29505	4.63368		2256	7.89829	5.53156	11.1971
2257	1.49087	0.997696	2.14532		2257	3.31782	2.29424	4.63427		2257	7.90648	5.5357	11.2135
2258	1.48945	0.995615	2.14507		2258	3.31593	2.29183	4.63344		2258	7.91229	5.53813	11.2281
2259	1.48707	0.993268	2.14414		2259	3.31302	2.28886	4.63187		2259	7.91681	5.53985	11.2416
2260	1.4833	0.989421	2.14232		2260	3.30866	2.28487	4.6293		2260	7.9196	5.54048	11.2536
2261	1.47943	0.986159	2.14034		2261	3.30418	2.28103	4.62659		2261	7.92211	5.54125	11.2652
2262	1.47678	0.984285	2.13831		2262	3.30104	2.27835	4.62476		2262	7.92598	5.54326	11.2774
2263	1.47536	0.983322	2.13689		2263	3.29926	2.27673	4.62387		2263	7.93132	5.54645	11.2904
2264	1.47628	0.984804	2.13902		2264	3.30003	2.2771	4.6247		2264	7.93947	5.55174	11.3051
2265	1.47982	0.988425	2.14245		2265	3.30365	2.27955	4.62754		2265	7.95085	5.55944	11.3219
2266	1.48442	0.992272	2.14596		2266	3.30849	2.28268	4.6313		2266	7.96372	5.56801	11.3398
2267	1.48938	0.995967	2.14973		2267	3.31376	2.28609	4.6354		2267	7.97717	5.57695	11.3581
2268	1.49044	0.995296	2.15116		2268	3.31495	2.28595	4.63686		2268	7.98625	5.58213	11.3735
2269	1.48871	0.993377	2.15066		2269	3.3131	2.2836	4.63614		2269	7.99179	5.58472	11.3865
2270	1.4851	0.989358	2.14891		2270	3.30922	2.27987	4.63402		2270	7.99494	5.58571	11.3976
2271	1.48107	0.985922	2.14682		2271	3.30487	2.27612	4.63151		2271	7.99737	5.58653	11.4081
2272	1.47704	0.982449	2.14471		2272	3.30052	2.27249	4.629		2272	7.9997	5.58752	11.4184
2273	1.47416	0.980444	2.14322		2273	3.2974	2.27003	4.62728		2273	8.0033	5.58975	11.4292
2274	1.47378	0.98092	2.14317		2274	3.29698	2.26984	4.62738		2274	8.00983	5.59437	11.4419
2275	1.47589	0.983318	2.14525		2275	3.29925	2.27126	4.62936		2275	8.01943	5.60128	11.4566
2276	1.47896	0.985874	2.14775		2276	3.30264	2.27337	4.63216		2276	8.03039	5.60898	11.4723
2277	1.48081	0.986581	2.14954		2277	3.30478	2.27438	4.63418		2277	8.0401	5.61541	11.4872
2278	1.48131	0.986418	2.15043		2278	3.30547	2.27425	4.63518		2278	8.04819	5.62048	11.5009
2279	1.4802	0.984975	2.15028		2279	3.30441	2.2728	4.63501		2279	8.0543	5.62403	11.5133
2280	1.47696	0.981443	2.14875		2280	3.30109	2.26978	4.63327		2280	8.05781	5.62566	11.5239
2281	1.47328	0.978317	2.14685		2281	3.29724	2.26711	4.63111		2281	8.06056	5.62699	11.5338
2282	1.4703	0.976028	2.14397		2282	3.29413	2.26502	4.62942		2282	8.06401	5.6291	11.544
2283	1.46802	0.974244	2.14106		2283	3.29178	2.26335	4.62825		2283	8.06828	5.63195	11.5547
2284	1.46744	0.974322	2.14072		2284	3.29127	2.26301	4.62831		2284	8.07454	5.63645	11.5665
2285	1.46978	0.977199	2.14484		2285	3.29389	2.2648	4.62882		2285	8.08431	5.64368	11.5807
2286	1.47436	0.980568	2.14964		2286	3.29897	2.26793	4.63328		2286	8.09694	5.65291	11.5969
2287	1.4784	0.982881	2.15282		2287	3.30353	2.27026	4.63759		2287	8.10918	5.66212	11.613
2288	1.48068	0.984437	2.15581		2288	3.30623	2.27153	4.64034		2288	8.11941	5.67113	11.6277
2289	1.4787	0.981411	2.15541		2289	3.30439	2.26919	4.63991		2289	8.12464	5.67245	11.6392
2290	1.47594	0.979308	2.15315		2290	3.3016	2.26731	4.63862		2290	8.12855	5.6728	11.6495
2291	1.4725	0.976588	2.15121		2291	3.29808	2.26475	4.63683		2291	8.13152	5.67421	11.6592
2292	1.4685	0.973088	2.14815		2292	3.29394	2.26188	4.63456		2292	8.13372	5.6753	11.6682
2293	1.46483	0.970139	2.14304		2293	3.29016	2.25881	4.63248		2293	8.13619	5.67685	11.6772
2294	1.46291	0.969147	2.14052		2294	3.28823	2.25619	4.63161		2294	8.14067	5.68018	11.6874
2295	1.46415	0.971003	2.14285		2295	3.28971	2.25803	4.63305		2295	8.14893	5.6865	11.7001
2296	1.4674	0.973292	2.14849		2296	3.2934	2.26157	4.63607		2296	8.15978	5.69458	11.7145
2297	1.47188	0.976311	2.15327		2297	3.29844	2.26458	4.64004		2297	8.17228	5.70694	11.7302
2298	1.47491	0.977783	2.1569		2298	3.30199	2.26621	4.64308		2298	8.18329	5.71746	11.7449
2299	1.4747	0.9768	2.15848		2299	3.30208	2.26546	4.64376		2299	8.19047	5.72199	11.7572
2300	1.4739	0.976012	2.15865		2300	3.30145	2.26491	4.64384		2300	8.19668	5.72573	11.7687
